# Supplementary material for: Rationally designed nanoarray catalysts for boosted photothermal CO2 hydrogenation
Source: Royal Society of Chemistry journal article supplement (doi:10.1039/d2nr02680e), 2022-01-01
Supplement: d2nr02680e1.pdf [file d2nr02680e1.pdf]

## Supporting Information

---

### **Rationally Designed Nanoarray Catalysts for Boosted Photothermal CO<sub>2</sub> Hydrogenation**

Xukai Shen,<sup>a</sup> Chaoran Li,<sup>\*a</sup> Zhiyi Wu,<sup>a</sup> Rui Tang,<sup>a</sup> Jiahui Shen,<sup>a</sup> Mingyu Chu,<sup>a</sup> Ao-Bo Xu,<sup>a</sup> Bingchang Zhang,<sup>\*b</sup> Le He<sup>\*a</sup> and Xiaohong Zhang<sup>a</sup>

<sup>a</sup>Institute of Functional Nano & Soft Materials (FUNSOM), Jiangsu Key Laboratory for Carbon Based Functional Materials & Devices, Soochow University, Suzhou, 215123, Jiangsu, PR China.

Email: lehe@suda.edu.cn; crli@suda.edu.cn

<sup>b</sup>School of Optoelectronic Science and Engineering, Key Laboratory of Advanced Optical Manufacturing Technologies of Jiangsu Province, Key Laboratory of Modern Optical Technologies of Education Ministry of China, Soochow University, Suzhou 215123, PR China

Email: zhangbingchang@suda.edu.cn

## Supporting Information

---

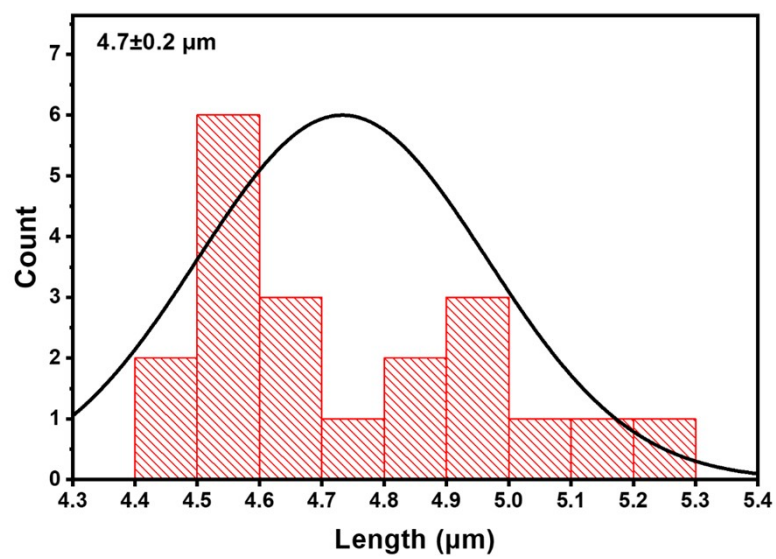

**Fig. S1** Length distribution of the SiNCs.

## Supporting Information

---

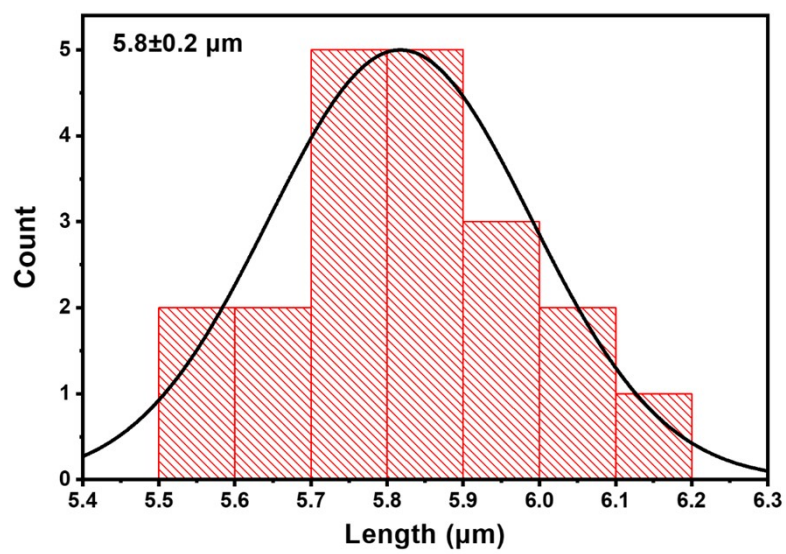

**Fig. S2** Length distribution of the SiNWs.

## Supporting Information

---

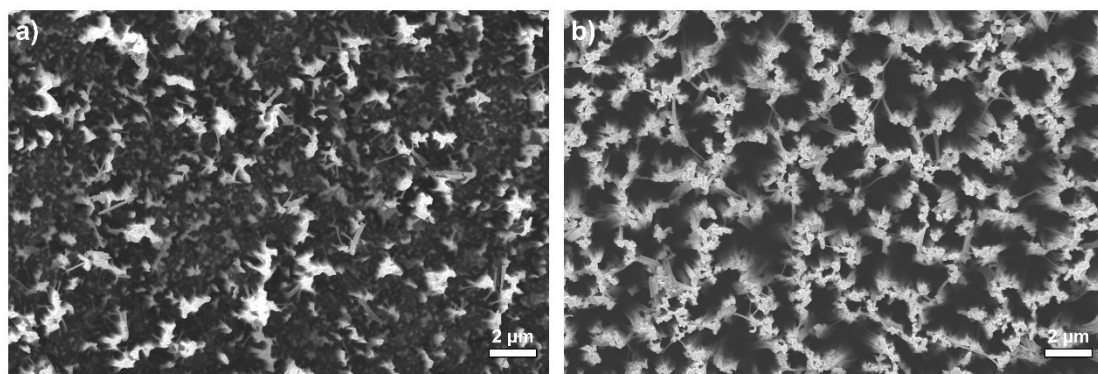

**Fig. S3** Top-view SEM images of (a) SiNCs@Co-1 and (b) SiNWs@Co-1.

## Supporting Information

---

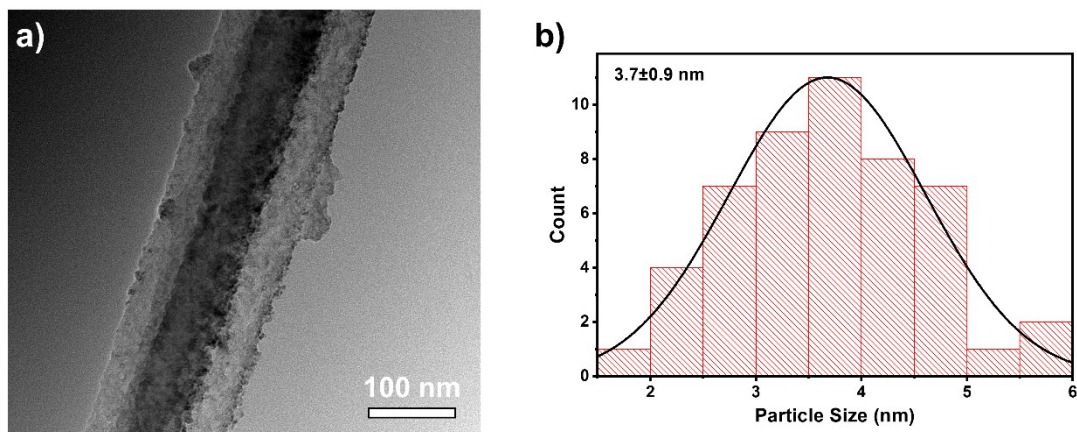

**Fig. S4** (a) TEM image of the bottom region of a single nanocone from SiNCs@Co-1 and (b) corresponding distribution of cobalt particle size.

## Supporting Information

---

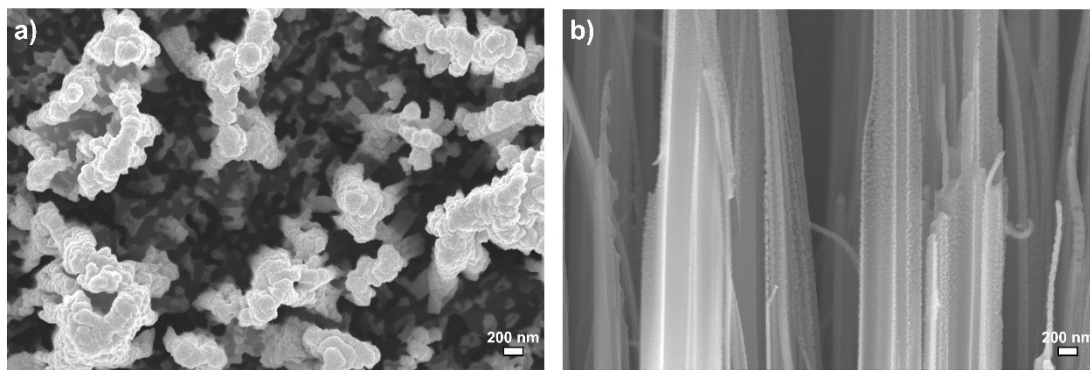

**Fig. S5** (a) Top-view and (b) cross-sectional SEM image of the SiNCs@Co-2.

## Supporting Information

---

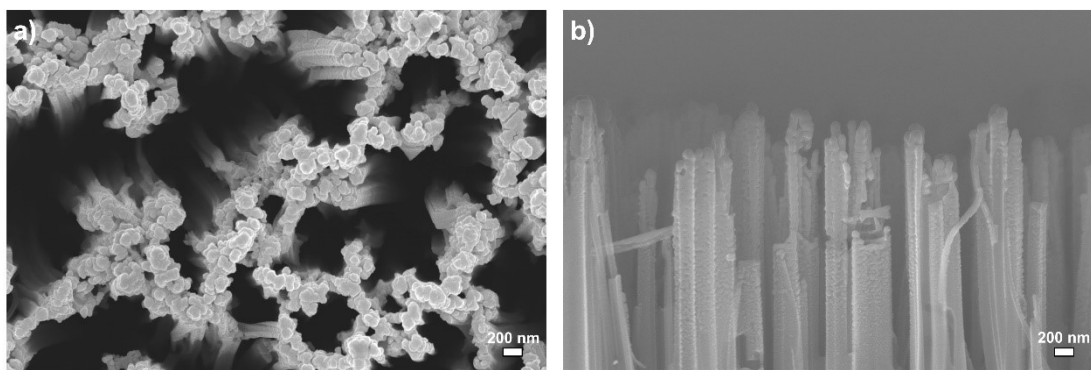

**Fig. S6** (a) Top-view and (b) cross-sectional SEM image of the SiNWs@Co-2.

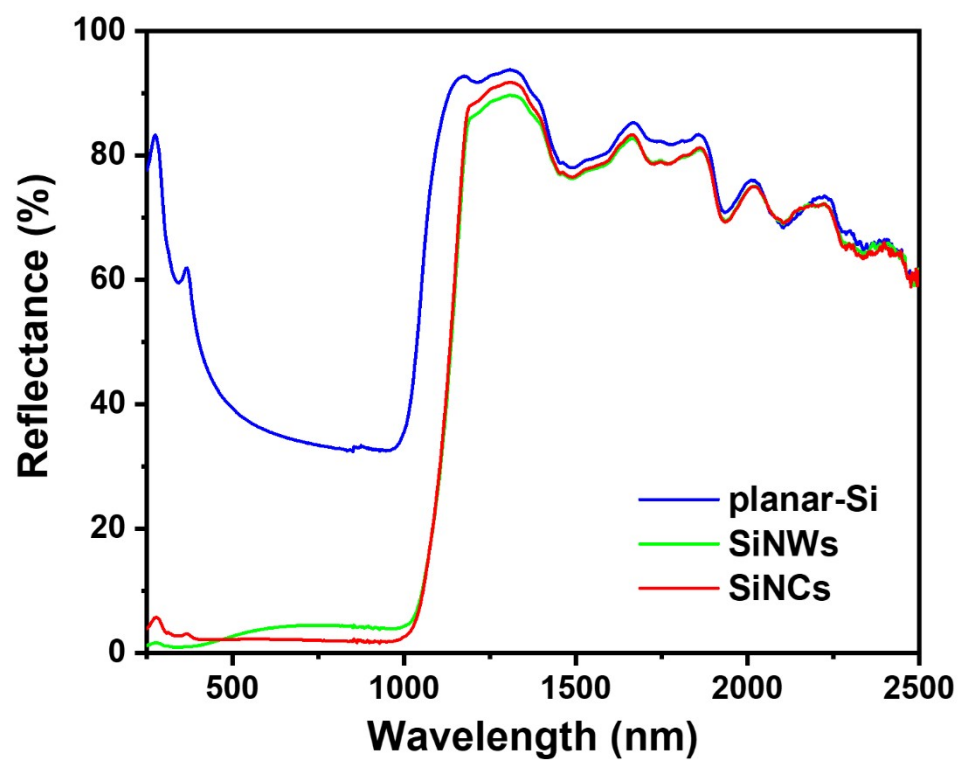

**Fig. S7** Diffuse reflectance spectra of planar-Si, SiNWs and SiNCs.



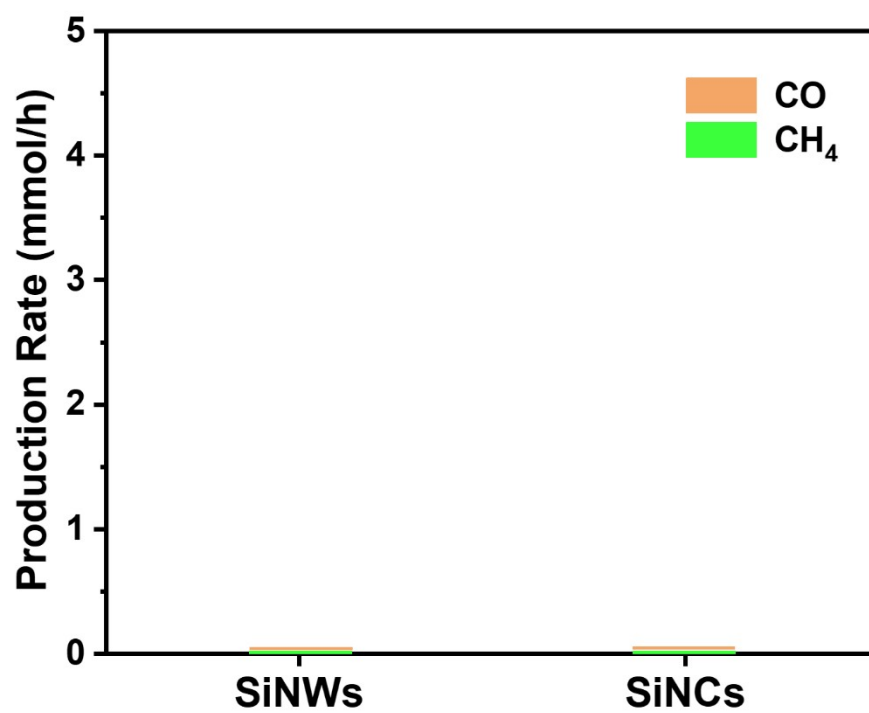

**Fig. S8** Performance of SiNWs and SiNCs in photothermal CO<sub>2</sub> hydrogenation.

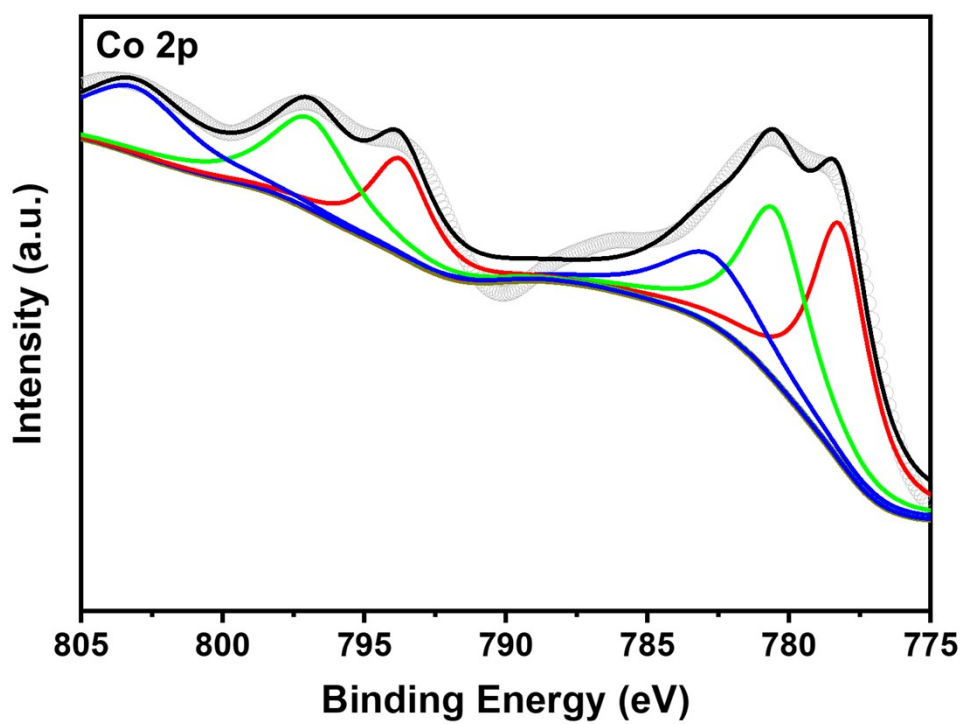

**Fig. S9** X-ray photoelectron spectroscopy (XPS) spectra of SiNCs@Co in the Co(2p) regions.

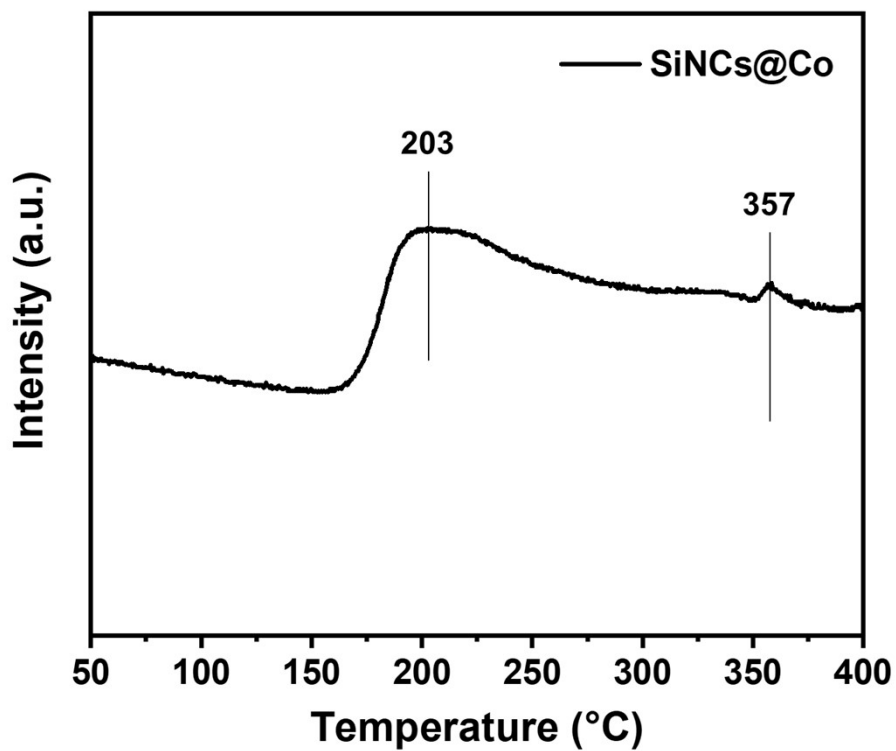

**Fig. S10** Hydrogen temperature programmed reduction ( $H_2$ -TPR) profile of SiNCs@Co.

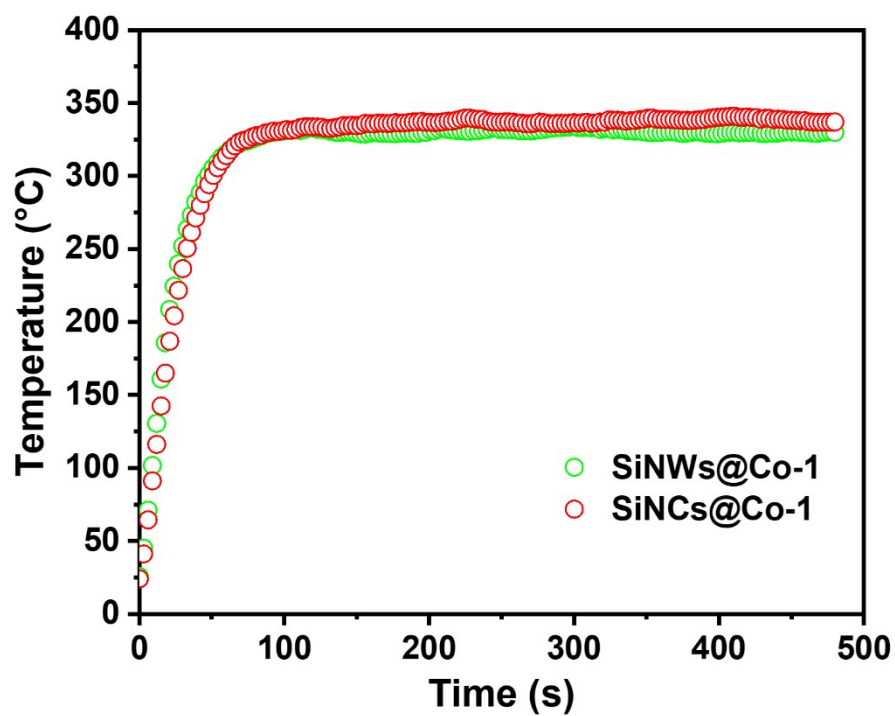

**Fig. S11** Surface temperature profiles of SiNCs@Co-1 and SiNWs@Co-1 upon 25-sun irradiation.

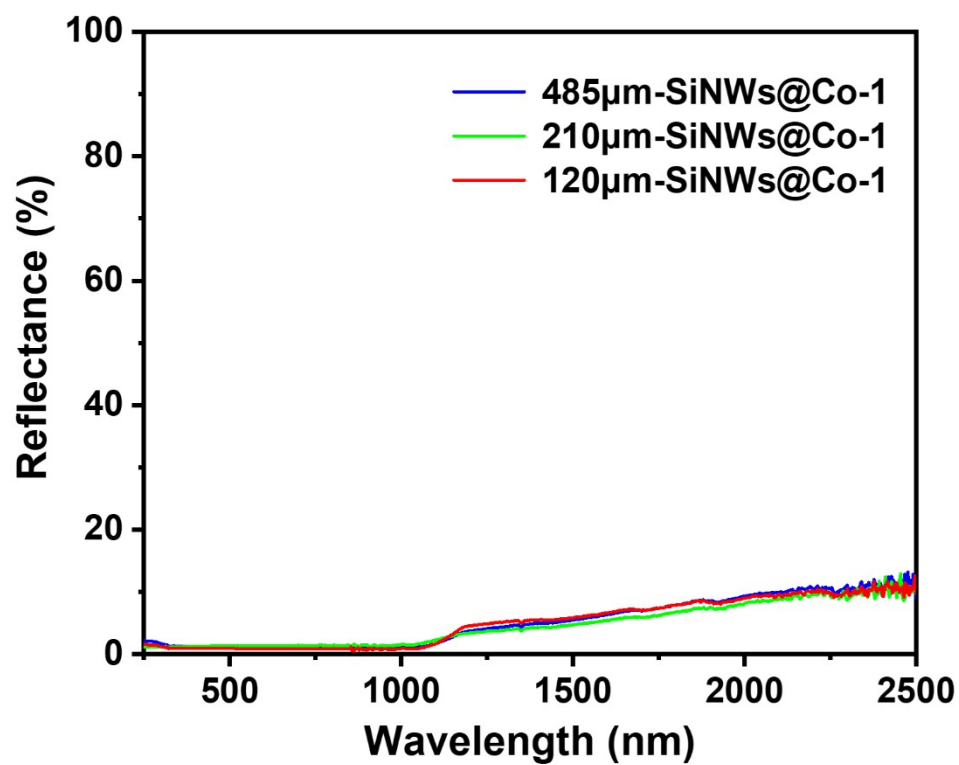

**Fig. S12** Diffuse reflectance spectra of SiNWs@Co-1 with different substrate thicknesses.

## Supporting Information

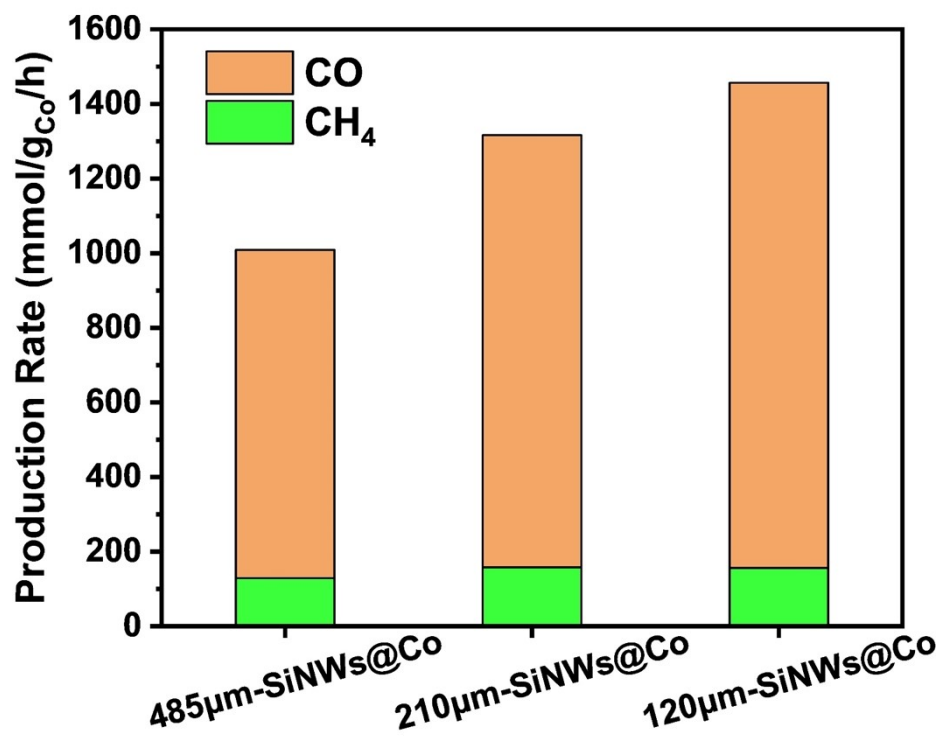

**Fig. S13** Catalytic performance of SiNWs@Co-1 with different substrate thicknesses in photothermal CO<sub>2</sub> hydrogenation.

## Supporting Information

---

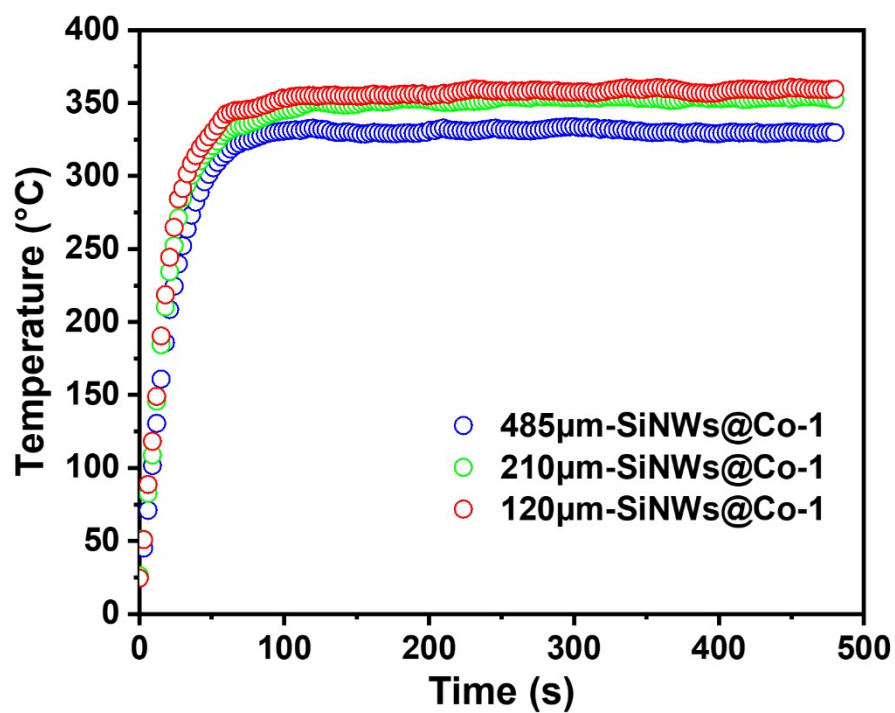

**Fig. S14** Surface temperature profiles of SiNWs@Co-1 with different substrate thicknesses upon 25-sun irradiation.

## Supporting Information

---

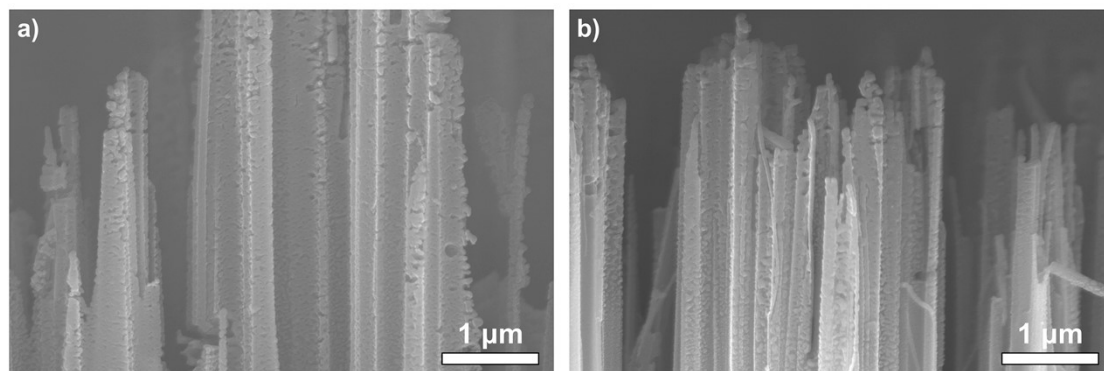

**Fig. S15** SEM images of (a) SiNCs@Co-1 and (b) SiNWs@Co-1 after photothermal catalytic test.
